# Supplementary material
Source: PubMed Central journal article supplement (PMC4589524)
Supplement: NIHMS718570-supplement-1.pdf [file NIHMS718570-supplement-1.pdf]

## **Inventory of Supplemental Information**

### **Supplemental Figures**

Figure S1. F-actin disruption induces nuclear exclusion of Yki in *hpo* mutant clones in *Drosophila* wing discs, related to Figure 1.

Figure S2. Hppy/MAP4K requires kinase activity to activate Hippo signaling, related to Figure 2.

Figure S3. JNK or TOR signaling is not required for Hppy to activate Hippo signaling, related to Figure 3.

Figure S4. Hppy functions redundantly with Hpo to regulate Yki in response to F-actin disruption, related to Figure 5.

Figure S5. Confirmation of Mst1/2-independent Hippo signaling induced by LatB and characterization of MAP4K1/2/3/5 knockdown efficiency, related to Figure 6.

Figure S6. Loss of *hppy* does not alter the size of *hpo* mutant clones, related to Figure 7.
